# Supplementary material
Source: PubMed Central journal article supplement (PMC7028974)
Supplement: AEM.01753-19-s0001.pdf [file AEM.01753-19-s0001.pdf]

**Table S1:** Frequency of the *C. jejuni* STs with their CC designation isolated from different sources ‘before intervention’.

| ST   | CC   | Source |           |            |            |                   |                     |            | Total |
|------|------|--------|-----------|------------|------------|-------------------|---------------------|------------|-------|
|      |      | Human  | Ruminants | Supplier A | Supplier B | Supplier ‘Others’ | Environmental water | Wild birds |       |
| 474  | 48   | 184    | 6         | 29         | 2          | 1                 | 2                   | 0          | 224   |
| 45   | 45   | 58     | 4         | 36         | 15         | 27                | 4                   | 11         | 155   |
| 50   | 21   | 35     | 34        | 5          | 17         | 13                | 1                   | 0          | 105   |
| 48   | 48   | 51     | 0         | 1          | 25         | 8                 | 0                   | 0          | 85    |
| 53   | 21   | 37     | 24        | 9          | 3          | 2                 | 0                   | 0          | 75    |
| 190  | 21   | 32     | 14        | 9          | 0          | 0                 | 0                   | 0          | 55    |
| 42   | 42   | 22     | 26        | 4          | 0          | 0                 | 1                   | 0          | 53    |
| 61   | 61   | 22     | 21        | 0          | 0          | 0                 | 1                   | 0          | 44    |
| 2026 | 403  | 14     | 22        | 0          | 0          | 0                 | 0                   | 0          | 36    |
| 257  | 257  | 17     | 0         | 9          | 3          | 2                 | 0                   | 0          | 31    |
| 354  | 354  | 26     | 0         | 3          | 0          | 1                 | 0                   | 0          | 30    |
| 451  | 21   | 9      | 0         | 0          | 0          | 21                | 0                   | 0          | 30    |
| 422  | 21   | 5      | 21        | 0          | 0          | 0                 | 3                   | 0          | 29    |
| 520  | 21   | 11     | 7         | 5          | 0          | 4                 | 0                   | 0          | 27    |
| 52   | 52   | 18     | 0         | 7          | 0          | 1                 | 0                   | 0          | 26    |
| 583  | 45   | 10     | 1         | 8          | 0          | 4                 | 0                   | 1          | 24    |
| 1517 | 354  | 11     | 6         | 0          | 6          | 0                 | 0                   | 0          | 23    |
| 38   | 48   | 18     | 1         | 0          | 0          | 0                 | 0                   | 0          | 19    |
| 2345 | 206  | 6      | 0         | 1          | 11         | 0                 | 0                   | 0          | 18    |
| 2381 | U/A  | 0      | 0         | 0          | 0          | 0                 | 16                  | 0          | 16    |
| 3609 | 48   | 0      | 0         | 0          | 15         | 0                 | 0                   | 0          | 15    |
| 21   | 21   | 6      | 5         | 0          | 1          | 0                 | 0                   | 0          | 12    |
| 436  | U/A  | 4      | 5         | 0          | 0          | 0                 | 1                   | 0          | 10    |
| 677  | 677  | 7      | 1         | 0          | 1          | 0                 | 1                   | 0          | 10    |
| 25   | 45   | 4      | 0         | 2          | 0          | 2                 | 1                   | 0          | 9     |
| 1225 | 1275 | 0      | 0         | 0          | 0          | 0                 | 7                   | 0          | 7     |
| 3676 | 42   | 5      | 1         | 0          | 0          | 0                 | 1                   | 0          | 7     |

Continue on next page

| ST   | CC   | Source |           |            |            |                   |                     |            | Total |
|------|------|--------|-----------|------------|------------|-------------------|---------------------|------------|-------|
|      |      | Human  | Ruminants | Supplier A | Supplier B | Supplier 'Others' | Environmental water | Wild birds |       |
| 3711 | 257  | 2      | 2         | 0          | 0          | 1                 | 0                   | 0          | 5     |
| 3717 | 21   | 1      | 0         | 0          | 0          | 3                 | 0                   | 0          | 4     |
| 137  | 45   | 1      | 0         | 0          | 0          | 0                 | 1                   | 1          | 3     |
| 658  | 658  | 2      | 0         | 0          | 0          | 1                 | 0                   | 0          | 3     |
| 1457 | U/A  | 3      | 0         | 0          | 0          | 0                 | 0                   | 0          | 3     |
| 2350 | 48   | 2      | 1         | 0          | 0          | 0                 | 0                   | 0          | 3     |
| 2392 | 52   | 2      | 1         | 0          | 0          | 0                 | 0                   | 0          | 3     |
| 3538 | U/A  | 2      | 0         | 0          | 0          | 0                 | 1                   | 0          | 3     |
| 3662 | 1275 | 0      | 0         | 0          | 0          | 0                 | 3                   | 0          | 3     |
| 3797 | 61   | 0      | 3         | 0          | 0          | 0                 | 0                   | 0          | 3     |
| 3799 | 61   | 0      | 3         | 0          | 0          | 0                 | 0                   | 0          | 3     |
| 177  | 177  | 0      | 0         | 0          | 0          | 0                 | 2                   | 0          | 2     |
| 459  | 42   | 2      | 0         | 0          | 0          | 0                 | 0                   | 0          | 2     |
| 696  | 1332 | 2      | 0         | 0          | 0          | 0                 | 0                   | 0          | 2     |
| 2354 | U/A  | 0      | 0         | 0          | 0          | 0                 | 1                   | 1          | 2     |
| 2391 | 1034 | 1      | 0         | 1          | 0          | 0                 | 0                   | 0          | 2     |
| 2536 | U/A  | 0      | 0         | 0          | 0          | 0                 | 0                   | 2          | 2     |
| 3610 | 21   | 0      | 1         | 0          | 0          | 0                 | 1                   | 0          | 2     |
| 3655 | U/A  | 0      | 0         | 0          | 0          | 0                 | 2                   | 0          | 2     |
| 3659 | 692  | 0      | 0         | 0          | 0          | 0                 | 2                   | 0          | 2     |
| 3663 | U/A  | 0      | 0         | 0          | 0          | 0                 | 2                   | 0          | 2     |
| 3712 | 362  | 2      | 0         | 0          | 0          | 0                 | 0                   | 0          | 2     |
| 3715 | 21   | 2      | 0         | 0          | 0          | 0                 | 0                   | 0          | 2     |
| 3719 | 48   | 0      | 1         | 0          | 1          | 0                 | 0                   | 0          | 2     |
| 3721 | 354  | 0      | 0         | 2          | 0          | 0                 | 0                   | 0          | 2     |
| 3726 | U/A  | 0      | 0         | 2          | 0          | 0                 | 0                   | 0          | 2     |
| 5    | 353  | 1      | 0         | 0          | 0          | 0                 | 0                   | 0          | 1     |
| 51   | 443  | 1      | 0         | 0          | 0          | 0                 | 0                   | 0          | 1     |
| 219  | 61   | 1      | 0         | 0          | 0          | 0                 | 0                   | 0          | 1     |
| 227  | 206  | 0      | 0         | 1          | 0          | 0                 | 0                   | 0          | 1     |

Continue on next page

| ST   | CC   | Source |           |            |            |                   |                     |            | Total |
|------|------|--------|-----------|------------|------------|-------------------|---------------------|------------|-------|
|      |      | Human  | Ruminants | Supplier A | Supplier B | Supplier 'Others' | Environmental water | Wild birds |       |
| 233  | 45   | 0      | 0         | 0          | 0          | 1                 | 0                   | 0          | 1     |
| 393  | 443  | 0      | 1         | 0          | 0          | 0                 | 0                   | 0          | 1     |
| 403  | 403  | 1      | 0         | 0          | 0          | 0                 | 0                   | 0          | 1     |
| 526  | U/A  | 0      | 0         | 0          | 0          | 0                 | 1                   | 0          | 1     |
| 578  | 61   | 1      | 0         | 0          | 0          | 0                 | 0                   | 0          | 1     |
| 618  | 61   | 0      | 1         | 0          | 0          | 0                 | 0                   | 0          | 1     |
| 681  | 682  | 0      | 0         | 0          | 0          | 0                 | 0                   | 1          | 1     |
| 694  | 1034 | 0      | 0         | 0          | 0          | 0                 | 1                   | 0          | 1     |
| 996  | U/A  | 0      | 0         | 0          | 0          | 0                 | 1                   | 0          | 1     |
| 1030 | U/A  | 0      | 0         | 0          | 0          | 0                 | 1                   | 0          | 1     |
| 1223 | 1275 | 0      | 0         | 0          | 0          | 0                 | 1                   | 0          | 1     |
| 1324 | U/A  | 0      | 0         | 0          | 0          | 0                 | 0                   | 1          | 1     |
| 1707 | 607  | 1      | 0         | 0          | 0          | 0                 | 0                   | 0          | 1     |
| 1818 | 45   | 0      | 0         | 0          | 1          | 0                 | 0                   | 0          | 1     |
| 1911 | U/A  | 0      | 0         | 0          | 1          | 0                 | 0                   | 0          | 1     |
| 2140 | 574  | 1      | 0         | 0          | 0          | 0                 | 0                   | 0          | 1     |
| 2219 | 45   | 1      | 0         | 0          | 0          | 0                 | 0                   | 0          | 1     |
| 2341 | 61   | 0      | 1         | 0          | 0          | 0                 | 0                   | 0          | 1     |
| 2343 | 48   | 1      | 0         | 0          | 0          | 0                 | 0                   | 0          | 1     |
| 2347 | U/A  | 0      | 0         | 0          | 0          | 0                 | 1                   | 0          | 1     |
| 2537 | 177  | 0      | 0         | 0          | 0          | 0                 | 0                   | 1          | 1     |
| 2538 | U/A  | 0      | 0         | 0          | 0          | 0                 | 0                   | 1          | 1     |
| 2539 | 177  | 0      | 0         | 0          | 0          | 0                 | 0                   | 1          | 1     |
| 2584 | 692  | 0      | 0         | 0          | 0          | 0                 | 1                   | 0          | 1     |
| 2619 | U/A  | 0      | 0         | 0          | 0          | 0                 | 1                   | 0          | 1     |
| 3093 | 21   | 0      | 0         | 0          | 0          | 1                 | 0                   | 0          | 1     |
| 3640 | U/A  | 0      | 0         | 0          | 0          | 0                 | 1                   | 0          | 1     |
| 3656 | U/A  | 0      | 0         | 0          | 0          | 0                 | 1                   | 0          | 1     |
| 3657 | 1275 | 0      | 0         | 0          | 0          | 0                 | 1                   | 0          | 1     |
| 3658 | U/A  | 0      | 0         | 0          | 0          | 0                 | 1                   | 0          | 1     |

Continue on next page

| ST           | CC   | Source |           |            |            |                   |                     | Wild birds | Total |
|--------------|------|--------|-----------|------------|------------|-------------------|---------------------|------------|-------|
|              |      | Human  | Ruminants | Supplier A | Supplier B | Supplier 'Others' | Environmental water |            |       |
| 3660         | U/A  | 0      | 0         | 0          | 0          | 0                 | 1                   | 0          | 1     |
| 3661         | 1275 | 0      | 0         | 0          | 0          | 0                 | 1                   | 0          | 1     |
| 3664         | 692  | 0      | 0         | 0          | 0          | 0                 | 1                   | 0          | 1     |
| 3672         | U/A  | 0      | 0         | 0          | 0          | 0                 | 1                   | 0          | 1     |
| 3673         | U/A  | 0      | 0         | 0          | 0          | 0                 | 1                   | 0          | 1     |
| 3674         | 1275 | 0      | 0         | 0          | 0          | 0                 | 1                   | 0          | 1     |
| 3675         | U/A  | 0      | 0         | 0          | 0          | 0                 | 1                   | 0          | 1     |
| 3713         | 21   | 1      | 0         | 0          | 0          | 0                 | 0                   | 0          | 1     |
| 3714         | 21   | 0      | 1         | 0          | 0          | 0                 | 0                   | 0          | 1     |
| 3718         | 48   | 1      | 0         | 0          | 0          | 0                 | 0                   | 0          | 1     |
| 3720         | 49   | 1      | 0         | 0          | 0          | 0                 | 0                   | 0          | 1     |
| 3722         | U/A  | 0      | 1         | 0          | 0          | 0                 | 0                   | 0          | 1     |
| 3725         | 692  | 0      | 0         | 0          | 1          | 0                 | 0                   | 0          | 1     |
| 3727         | 45   | 1      | 0         | 0          | 0          | 0                 | 0                   | 0          | 1     |
| 3728         | U/A  | 1      | 0         | 0          | 0          | 0                 | 0                   | 0          | 1     |
| 3784         | 354  | 1      | 0         | 0          | 0          | 0                 | 0                   | 0          | 1     |
| 3792         | 257  | 1      | 0         | 0          | 0          | 0                 | 0                   | 0          | 1     |
| 3794         | 21   | 0      | 1         | 0          | 0          | 0                 | 0                   | 0          | 1     |
| 3795         | 403  | 0      | 1         | 0          | 0          | 0                 | 0                   | 0          | 1     |
| 3796         | U/A  | 0      | 1         | 0          | 0          | 0                 | 0                   | 0          | 1     |
| 3798         | 403  | 0      | 1         | 0          | 0          | 0                 | 0                   | 0          | 1     |
| 3800         | U/A  | 0      | 0         | 0          | 0          | 0                 | 1                   | 0          | 1     |
| 3802         | 45   | 0      | 0         | 0          | 0          | 0                 | 1                   | 0          | 1     |
| 3803         | U/A  | 0      | 0         | 0          | 0          | 0                 | 1                   | 0          | 1     |
| 4494         | 61   | 0      | 1         | 0          | 0          | 0                 | 0                   | 0          | 1     |
| <b>Total</b> |      | 652    | 221       | 134        | 103        | 93                | 76                  | 21         | 1300  |

**Table S2:** Frequency of the *C. jejuni* STs with their CC designation isolated from different sources ‘after intervention’.

| ST   | CC  | Source |           |            |            |                   |                     |            | Total |
|------|-----|--------|-----------|------------|------------|-------------------|---------------------|------------|-------|
|      |     | Human  | Ruminants | Supplier A | Supplier B | Supplier ‘Others’ | Environmental water | Wild birds |       |
| 45   | 45  | 128    | 8         | 29         | 24         | 31                | 4                   | 26         | 250   |
| 50   | 21  | 88     | 39        | 9          | 24         | 9                 | 0                   | 0          | 169   |
| 474  | 48  | 97     | 8         | 21         | 2          | 4                 | 0                   | 0          | 132   |
| 53   | 21  | 77     | 11        | 12         | 19         | 8                 | 0                   | 2          | 129   |
| 48   | 48  | 44     | 0         | 0          | 63         | 3                 | 0                   | 0          | 110   |
| 61   | 61  | 61     | 30        | 2          | 5          | 0                 | 0                   | 0          | 98    |
| 583  | 45  | 36     | 4         | 24         | 6          | 13                | 0                   | 7          | 90    |
| 42   | 42  | 53     | 31        | 1          | 2          | 0                 | 0                   | 2          | 89    |
| 190  | 21  | 45     | 12        | 2          | 0          | 2                 | 0                   | 0          | 61    |
| 520  | 21  | 33     | 11        | 3          | 2          | 3                 | 0                   | 0          | 52    |
| 6964 | 354 | 7      | 0         | 9          | 11         | 16                | 0                   | 0          | 43    |
| 2026 | 403 | 22     | 14        | 0          | 0          | 0                 | 1                   | 1          | 38    |
| 422  | 21  | 17     | 15        | 0          | 0          | 2                 | 3                   | 0          | 37    |
| 2345 | 206 | 22     | 0         | 12         | 2          | 0                 | 0                   | 1          | 37    |
| 257  | 257 | 24     | 1         | 7          | 2          | 1                 | 0                   | 0          | 35    |
| 21   | 21  | 21     | 4         | 0          | 1          | 8                 | 0                   | 0          | 34    |
| 354  | 354 | 15     | 0         | 11         | 0          | 5                 | 0                   | 0          | 31    |
| 436  | U/A | 20     | 7         | 0          | 0          | 0                 | 0                   | 0          | 27    |
| 1517 | 354 | 12     | 9         | 0          | 0          | 1                 | 1                   | 0          | 23    |
| 38   | 48  | 13     | 4         | 0          | 2          | 0                 | 1                   | 0          | 20    |
| 677  | 677 | 15     | 0         | 0          | 0          | 0                 | 0                   | 2          | 17    |
| 3105 | U/A | 1      | 0         | 13         | 1          | 2                 | 0                   | 0          | 17    |
| 1326 | 45  | 2      | 0         | 9          | 0          | 3                 | 0                   | 1          | 14    |
| 3711 | 257 | 12     | 1         | 0          | 1          | 0                 | 0                   | 0          | 14    |
| 137  | 45  | 8      | 0         | 1          | 0          | 0                 | 0                   | 4          | 13    |
| 51   | 443 | 9      | 0         | 2          | 0          | 0                 | 0                   | 0          | 11    |
| 508  | 508 | 9      | 2         | 0          | 0          | 0                 | 0                   | 0          | 11    |

Continue on next page

| ST   | CC   | Source |           |            |            |                   |                     |            | Total |
|------|------|--------|-----------|------------|------------|-------------------|---------------------|------------|-------|
|      |      | Human  | Ruminants | Supplier A | Supplier B | Supplier 'Others' | Environmental water | Wild birds |       |
| 1033 | 1034 | 1      | 0         | 1          | 0          | 1                 | 0                   | 8          | 11    |
| 3676 | 42   | 9      | 0         | 0          | 0          | 1                 | 0                   | 0          | 10    |
| 538  | 45   | 6      | 0         | 2          | 0          | 0                 | 0                   | 2          | 10    |
| 696  | 1332 | 1      | 0         | 4          | 0          | 1                 | 0                   | 3          | 9     |
| 1324 | U/A  | 0      | 0         | 0          | 0          | 0                 | 0                   | 9          | 9     |
| 4337 | 21   | 7      | 0         | 0          | 2          | 0                 | 0                   | 0          | 9     |
| 486  | 21   | 3      | 0         | 0          | 5          | 0                 | 0                   | 0          | 8     |
| 52   | 52   | 3      | 0         | 4          | 0          | 0                 | 0                   | 0          | 7     |
| 535  | 460  | 0      | 0         | 5          | 2          | 0                 | 0                   | 0          | 7     |
| 995  | U/A  | 0      | 0         | 0          | 0          | 0                 | 0                   | 7          | 7     |
| 2388 | U/A  | 7      | 0         | 0          | 0          | 0                 | 0                   | 0          | 7     |
| 403  | 403  | 5      | 1         | 0          | 0          | 0                 | 0                   | 0          | 6     |
| 699  | 692  | 0      | 0         | 0          | 0          | 0                 | 0                   | 6          | 6     |
| 2389 | U/A  | 0      | 0         | 3          | 2          | 1                 | 0                   | 0          | 6     |
| 3538 | U/A  | 6      | 0         | 0          | 0          | 0                 | 0                   | 0          | 6     |
| 3610 | 21   | 5      | 1         | 0          | 0          | 0                 | 0                   | 0          | 6     |
| 3640 | U/A  | 0      | 0         | 0          | 0          | 0                 | 2                   | 4          | 6     |
| 4499 | U/A  | 0      | 0         | 0          | 0          | 0                 | 0                   | 6          | 6     |
| 25   | 45   | 4      | 0         | 1          | 0          | 0                 | 0                   | 0          | 5     |
| 177  | 177  | 0      | 1         | 0          | 0          | 0                 | 0                   | 4          | 5     |
| 618  | 61   | 1      | 4         | 0          | 0          | 0                 | 0                   | 0          | 5     |
| 710  | U/A  | 0      | 0         | 0          | 0          | 0                 | 0                   | 5          | 5     |
| 991  | 692  | 1      | 2         | 0          | 0          | 0                 | 0                   | 2          | 5     |
| 2343 | 48   | 4      | 0         | 0          | 0          | 1                 | 0                   | 0          | 5     |
| 2350 | 48   | 4      | 0         | 0          | 1          | 0                 | 0                   | 0          | 5     |
| 2378 | 1034 | 0      | 0         | 0          | 0          | 0                 | 1                   | 4          | 5     |
| 2381 | U/A  | 0      | 0         | 0          | 0          | 0                 | 4                   | 1          | 5     |
| 2535 | U/A  | 3      | 0         | 0          | 0          | 1                 | 0                   | 1          | 5     |
| 3798 | 403  | 5      | 0         | 0          | 0          | 0                 | 0                   | 0          | 5     |
| 393  | 443  | 2      | 2         | 0          | 0          | 0                 | 0                   | 0          | 4     |

Continue on next page

| ST   | CC   | Source |           |            |            |                   |                     |            | Total |
|------|------|--------|-----------|------------|------------|-------------------|---------------------|------------|-------|
|      |      | Human  | Ruminants | Supplier A | Supplier B | Supplier 'Others' | Environmental water | Wild birds |       |
| 658  | 658  | 2      | 0         | 2          | 0          | 0                 | 0                   | 0          | 4     |
| 692  | 692  | 0      | 0         | 0          | 0          | 0                 | 1                   | 3          | 4     |
| 977  | 1034 | 1      | 0         | 0          | 0          | 0                 | 0                   | 3          | 4     |
| 992  | U/A  | 0      | 0         | 1          | 0          | 0                 | 1                   | 2          | 4     |
| 1225 | 1275 | 0      | 0         | 0          | 0          | 0                 | 4                   | 0          | 4     |
| 1256 | 1034 | 0      | 0         | 0          | 0          | 0                 | 0                   | 4          | 4     |
| 1457 | U/A  | 1      | 0         | 0          | 0          | 0                 | 0                   | 3          | 4     |
| 1525 | U/A  | 0      | 0         | 0          | 0          | 0                 | 0                   | 4          | 4     |
| 2354 | U/A  | 0      | 0         | 0          | 0          | 0                 | 0                   | 4          | 4     |
| 2391 | 1034 | 0      | 0         | 0          | 0          | 0                 | 0                   | 4          | 4     |
| 3961 | U/A  | 0      | 0         | 0          | 0          | 0                 | 0                   | 4          | 4     |
| 4492 | 61   | 4      | 0         | 0          | 0          | 0                 | 0                   | 0          | 4     |
| 356  | 353  | 0      | 0         | 3          | 0          | 0                 | 0                   | 0          | 3     |
| 693  | U/A  | 0      | 0         | 0          | 0          | 0                 | 0                   | 3          | 3     |
| 1286 | U/A  | 0      | 0         | 0          | 0          | 0                 | 0                   | 3          | 3     |
| 1342 | U/A  | 0      | 0         | 0          | 0          | 0                 | 0                   | 3          | 3     |
| 2347 | U/A  | 0      | 0         | 0          | 0          | 0                 | 0                   | 3          | 3     |
| 2392 | 52   | 0      | 3         | 0          | 0          | 0                 | 0                   | 0          | 3     |
| 2584 | 692  | 2      | 0         | 0          | 0          | 1                 | 0                   | 0          | 3     |
| 3655 | U/A  | 0      | 0         | 0          | 0          | 0                 | 0                   | 3          | 3     |
| 3721 | 354  | 0      | 0         | 3          | 0          | 0                 | 0                   | 0          | 3     |
| 5648 | 692  | 0      | 0         | 0          | 0          | 0                 | 0                   | 3          | 3     |
| 227  | 206  | 1      | 0         | 0          | 0          | 1                 | 0                   | 0          | 2     |
| 353  | 353  | 2      | 0         | 0          | 0          | 0                 | 0                   | 0          | 2     |
| 526  | U/A  | 0      | 0         | 0          | 0          | 0                 | 0                   | 2          | 2     |
| 1223 | 1275 | 0      | 0         | 0          | 0          | 0                 | 0                   | 2          | 2     |
| 1255 | 1034 | 0      | 0         | 0          | 0          | 0                 | 0                   | 2          | 2     |
| 1304 | 1304 | 0      | 0         | 0          | 0          | 0                 | 0                   | 2          | 2     |
| 1900 | 658  | 0      | 0         | 0          | 2          | 0                 | 0                   | 0          | 2     |
| 2340 | 61   | 1      | 1         | 0          | 0          | 0                 | 0                   | 0          | 2     |

Continue on next page

| ST   | CC  | Source |           |            |            |                   |                     |            | Total |
|------|-----|--------|-----------|------------|------------|-------------------|---------------------|------------|-------|
|      |     | Human  | Ruminants | Supplier A | Supplier B | Supplier 'Others' | Environmental water | Wild birds |       |
| 2351 | U/A | 0      | 0         | 0          | 0          | 0                 | 0                   | 2          | 2     |
| 2370 | 61  | 2      | 0         | 0          | 0          | 0                 | 0                   | 0          | 2     |
| 2380 | U/A | 2      | 0         | 0          | 0          | 0                 | 0                   | 0          | 2     |
| 3675 | U/A | 0      | 0         | 0          | 0          | 0                 | 1                   | 1          | 2     |
| 3717 | 21  | 2      | 0         | 0          | 0          | 0                 | 0                   | 0          | 2     |
| 3799 | 61  | 2      | 0         | 0          | 0          | 0                 | 0                   | 0          | 2     |
| 3959 | 61  | 0      | 2         | 0          | 0          | 0                 | 0                   | 0          | 2     |
| 4338 | 21  | 1      | 1         | 0          | 0          | 0                 | 0                   | 0          | 2     |
| 4497 | U/A | 0      | 0         | 0          | 0          | 0                 | 1                   | 1          | 2     |
| 4500 | U/A | 0      | 0         | 1          | 0          | 0                 | 0                   | 1          | 2     |
| 4508 | U/A | 0      | 0         | 0          | 0          | 0                 | 0                   | 2          | 2     |
| 5655 | 21  | 1      | 1         | 0          | 0          | 0                 | 0                   | 0          | 2     |
| 5656 | 354 | 0      | 2         | 0          | 0          | 0                 | 0                   | 0          | 2     |
| 6997 | 403 | 1      | 1         | 0          | 0          | 0                 | 0                   | 0          | 2     |
| 7769 | 21  | 2      | 0         | 0          | 0          | 0                 | 0                   | 0          | 2     |
| 8076 | 45  | 2      | 0         | 0          | 0          | 0                 | 0                   | 0          | 2     |
| 5    | 353 | 1      | 0         | 0          | 0          | 0                 | 0                   | 0          | 1     |
| 22   | 22  | 1      | 0         | 0          | 0          | 0                 | 0                   | 0          | 1     |
| 81   | 61  | 1      | 0         | 0          | 0          | 0                 | 0                   | 0          | 1     |
| 97   | 45  | 1      | 0         | 0          | 0          | 0                 | 0                   | 0          | 1     |
| 233  | 45  | 1      | 0         | 0          | 0          | 0                 | 0                   | 0          | 1     |
| 249  | 21  | 1      | 0         | 0          | 0          | 0                 | 0                   | 0          | 1     |
| 320  | 45  | 1      | 0         | 0          | 0          | 0                 | 0                   | 0          | 1     |
| 366  | 257 | 1      | 0         | 0          | 0          | 0                 | 0                   | 0          | 1     |
| 449  | U/A | 1      | 0         | 0          | 0          | 0                 | 0                   | 0          | 1     |
| 451  | 21  | 1      | 0         | 0          | 0          | 0                 | 0                   | 0          | 1     |
| 459  | 42  | 1      | 0         | 0          | 0          | 0                 | 0                   | 0          | 1     |
| 460  | 460 | 1      | 0         | 0          | 0          | 0                 | 0                   | 0          | 1     |
| 528  | 354 | 1      | 0         | 0          | 0          | 0                 | 0                   | 0          | 1     |
| 560  | 257 | 1      | 0         | 0          | 0          | 0                 | 0                   | 0          | 1     |

Continue on next page



| ST   | CC   | Source |           |            |            |                   |                     |            | Total |
|------|------|--------|-----------|------------|------------|-------------------|---------------------|------------|-------|
|      |      | Human  | Ruminants | Supplier A | Supplier B | Supplier 'Others' | Environmental water | Wild birds |       |
| 577  | 21   | 1      | 0         | 0          | 0          | 0                 | 0                   | 0          | 1     |
| 578  | 61   | 1      | 0         | 0          | 0          | 0                 | 0                   | 0          | 1     |
| 681  | 682  | 0      | 0         | 0          | 0          | 0                 | 0                   | 1          | 1     |
| 704  | U/A  | 1      | 0         | 0          | 0          | 0                 | 0                   | 0          | 1     |
| 767  | 45   | 0      | 1         | 0          | 0          | 0                 | 0                   | 0          | 1     |
| 1232 | 353  | 1      | 0         | 0          | 0          | 0                 | 0                   | 0          | 1     |
| 1336 | 1275 | 0      | 0         | 0          | 0          | 0                 | 0                   | 1          | 1     |
| 1340 | 177  | 0      | 0         | 0          | 0          | 1                 | 0                   | 0          | 1     |
| 1919 | 52   | 1      | 0         | 0          | 0          | 0                 | 0                   | 1          | 1     |
| 1956 | 1034 | 0      | 0         | 0          | 0          | 0                 | 0                   | 1          | 1     |
| 1972 | U/A  | 1      | 0         | 0          | 0          | 0                 | 0                   | 0          | 1     |
| 2076 | 353  | 1      | 0         | 0          | 0          | 0                 | 0                   | 0          | 1     |
| 2212 | 45   | 1      | 0         | 0          | 0          | 0                 | 0                   | 0          | 1     |
| 2341 | 61   | 1      | 0         | 0          | 0          | 0                 | 0                   | 0          | 1     |
| 2349 | U/A  | 0      | 0         | 0          | 0          | 0                 | 0                   | 1          | 1     |
| 2353 | U/A  | 0      | 0         | 0          | 0          | 0                 | 0                   | 1          | 1     |
| 2357 | 61   | 0      | 1         | 0          | 0          | 0                 | 0                   | 0          | 1     |
| 2537 | 177  | 0      | 0         | 0          | 0          | 0                 | 0                   | 1          | 1     |
| 2538 | U/A  | 0      | 0         | 0          | 0          | 0                 | 0                   | 1          | 1     |
| 2619 | U/A  | 0      | 0         | 0          | 0          | 0                 | 1                   | 0          | 1     |
| 2654 | U/A  | 0      | 0         | 0          | 0          | 0                 | 0                   | 1          | 1     |
| 2895 | 574  | 1      | 0         | 0          | 0          | 0                 | 0                   | 0          | 1     |
| 2991 | 45   | 0      | 0         | 1          | 0          | 0                 | 0                   | 0          | 1     |
| 3456 | 45   | 0      | 1         | 0          | 0          | 0                 | 0                   | 0          | 1     |
| 3609 | 48   | 0      | 0         | 0          | 1          | 0                 | 0                   | 0          | 1     |
| 3643 | U/A  | 0      | 0         | 0          | 0          | 0                 | 1                   | 0          | 1     |
| 3712 | 362  | 1      | 0         | 0          | 0          | 0                 | 0                   | 0          | 1     |
| 3716 | 21   | 0      | 1         | 0          | 0          | 0                 | 0                   | 0          | 1     |
| 3724 | U/A  | 0      | 1         | 0          | 0          | 0                 | 0                   | 0          | 1     |
| 3792 | 257  | 0      | 0         | 0          | 1          | 0                 | 0                   | 0          | 1     |

Continue on next page

| ST   | CC  | Source |           |            |            |                   |                     |            | Total |
|------|-----|--------|-----------|------------|------------|-------------------|---------------------|------------|-------|
|      |     | Human  | Ruminants | Supplier A | Supplier B | Supplier 'Others' | Environmental water | Wild birds |       |
| 3793 | 61  | 1      | 0         | 0          | 0          | 0                 | 0                   | 0          | 1     |
| 3801 | U/A | 0      | 0         | 0          | 0          | 0                 | 1                   | 0          | 1     |
| 3842 | 61  | 0      | 1         | 0          | 0          | 0                 | 0                   | 0          | 1     |
| 3844 | U/A | 0      | 0         | 0          | 0          | 0                 | 1                   | 0          | 1     |
| 4011 | 42  | 0      | 1         | 0          | 0          | 0                 | 0                   | 0          | 1     |
| 4336 | U/A | 0      | 0         | 0          | 0          | 0                 | 0                   | 1          | 1     |
| 4339 | U/A | 0      | 0         | 0          | 0          | 0                 | 0                   | 1          | 1     |
| 4496 | U/A | 0      | 0         | 0          | 0          | 0                 | 0                   | 1          | 1     |
| 4498 | 42  | 0      | 0         | 0          | 0          | 0                 | 0                   | 1          | 1     |
| 4501 | U/A | 0      | 0         | 0          | 0          | 0                 | 0                   | 1          | 1     |
| 4502 | 692 | 0      | 0         | 0          | 0          | 0                 | 0                   | 1          | 1     |
| 4503 | 42  | 0      | 0         | 0          | 0          | 0                 | 0                   | 1          | 1     |
| 4504 | U/A | 0      | 0         | 0          | 0          | 0                 | 0                   | 1          | 1     |
| 4505 | 21  | 1      | 0         | 0          | 0          | 0                 | 0                   | 0          | 1     |
| 4506 | 52  | 1      | 0         | 0          | 0          | 0                 | 0                   | 0          | 1     |
| 4507 | U/A | 1      | 0         | 0          | 0          | 0                 | 0                   | 0          | 1     |
| 4509 | U/A | 0      | 0         | 0          | 0          | 0                 | 0                   | 1          | 1     |
| 4524 | U/A | 0      | 0         | 0          | 0          | 0                 | 0                   | 1          | 1     |
| 4684 | U/A | 1      | 0         | 0          | 0          | 0                 | 0                   | 0          | 1     |
| 5012 | 48  | 0      | 0         | 0          | 1          | 0                 | 0                   | 0          | 1     |
| 5326 | U/A | 1      | 0         | 0          | 0          | 0                 | 0                   | 0          | 1     |
| 5540 | 21  | 0      | 1         | 0          | 0          | 0                 | 0                   | 0          | 1     |
| 5646 | 952 | 0      | 0         | 0          | 0          | 0                 | 0                   | 1          | 1     |
| 5649 | 21  | 1      | 0         | 0          | 0          | 0                 | 0                   | 0          | 1     |
| 5651 | 45  | 0      | 0         | 1          | 0          | 0                 | 0                   | 0          | 1     |
| 5652 | U/A | 0      | 1         | 0          | 0          | 0                 | 0                   | 0          | 1     |
| 5654 | 354 | 0      | 1         | 0          | 0          | 0                 | 0                   | 0          | 1     |
| 6130 | 362 | 1      | 0         | 0          | 0          | 0                 | 0                   | 0          | 1     |
| 7323 | U/A | 1      | 0         | 0          | 0          | 0                 | 0                   | 0          | 1     |
| 7765 | 61  | 1      | 0         | 0          | 0          | 0                 | 0                   | 0          | 1     |

Continue on next page

| ST           | CC  | Source |           |            |            |                   |                     |            | Total |
|--------------|-----|--------|-----------|------------|------------|-------------------|---------------------|------------|-------|
|              |     | Human  | Ruminants | Supplier A | Supplier B | Supplier 'Others' | Environmental water | Wild birds |       |
| 7766         | 45  | 0      | 0         | 0          | 0          | 1                 | 0                   | 0          | 1     |
| 7771         | 21  | 1      | 0         | 0          | 0          | 0                 | 0                   | 0          | 1     |
| 7795         | 45  | 1      | 0         | 0          | 0          | 0                 | 0                   | 0          | 1     |
| 7796         | 61  | 1      | 0         | 0          | 0          | 0                 | 0                   | 0          | 1     |
| 8065         | 353 | 1      | 0         | 0          | 0          | 0                 | 0                   | 0          | 1     |
| 8066         | 45  | 0      | 0         | 0          | 0          | 1                 | 0                   | 0          | 1     |
| 8067         | 692 | 0      | 0         | 0          | 0          | 1                 | 0                   | 0          | 1     |
| 8069         | 45  | 1      | 0         | 0          | 0          | 0                 | 0                   | 0          | 1     |
| 8070         | 21  | 1      | 0         | 0          | 0          | 0                 | 0                   | 0          | 1     |
| 8072         | 45  | 0      | 1         | 0          | 0          | 0                 | 0                   | 0          | 1     |
| 8075         | 21  | 1      | 0         | 0          | 0          | 0                 | 0                   | 0          | 1     |
| 8184         | 42  | 1      | 0         | 0          | 0          | 0                 | 0                   | 0          | 1     |
| 8187         | U/A | 0      | 0         | 0          | 1          | 0                 | 0                   | 0          | 1     |
| 208          | 682 | 0      | 0         | 0          | 0          | 0                 | 0                   | 1          | 1     |
| <b>Total</b> |     | 1040   | 244       | 199        | 185        | 123               | 29                  | 193        | 2013  |

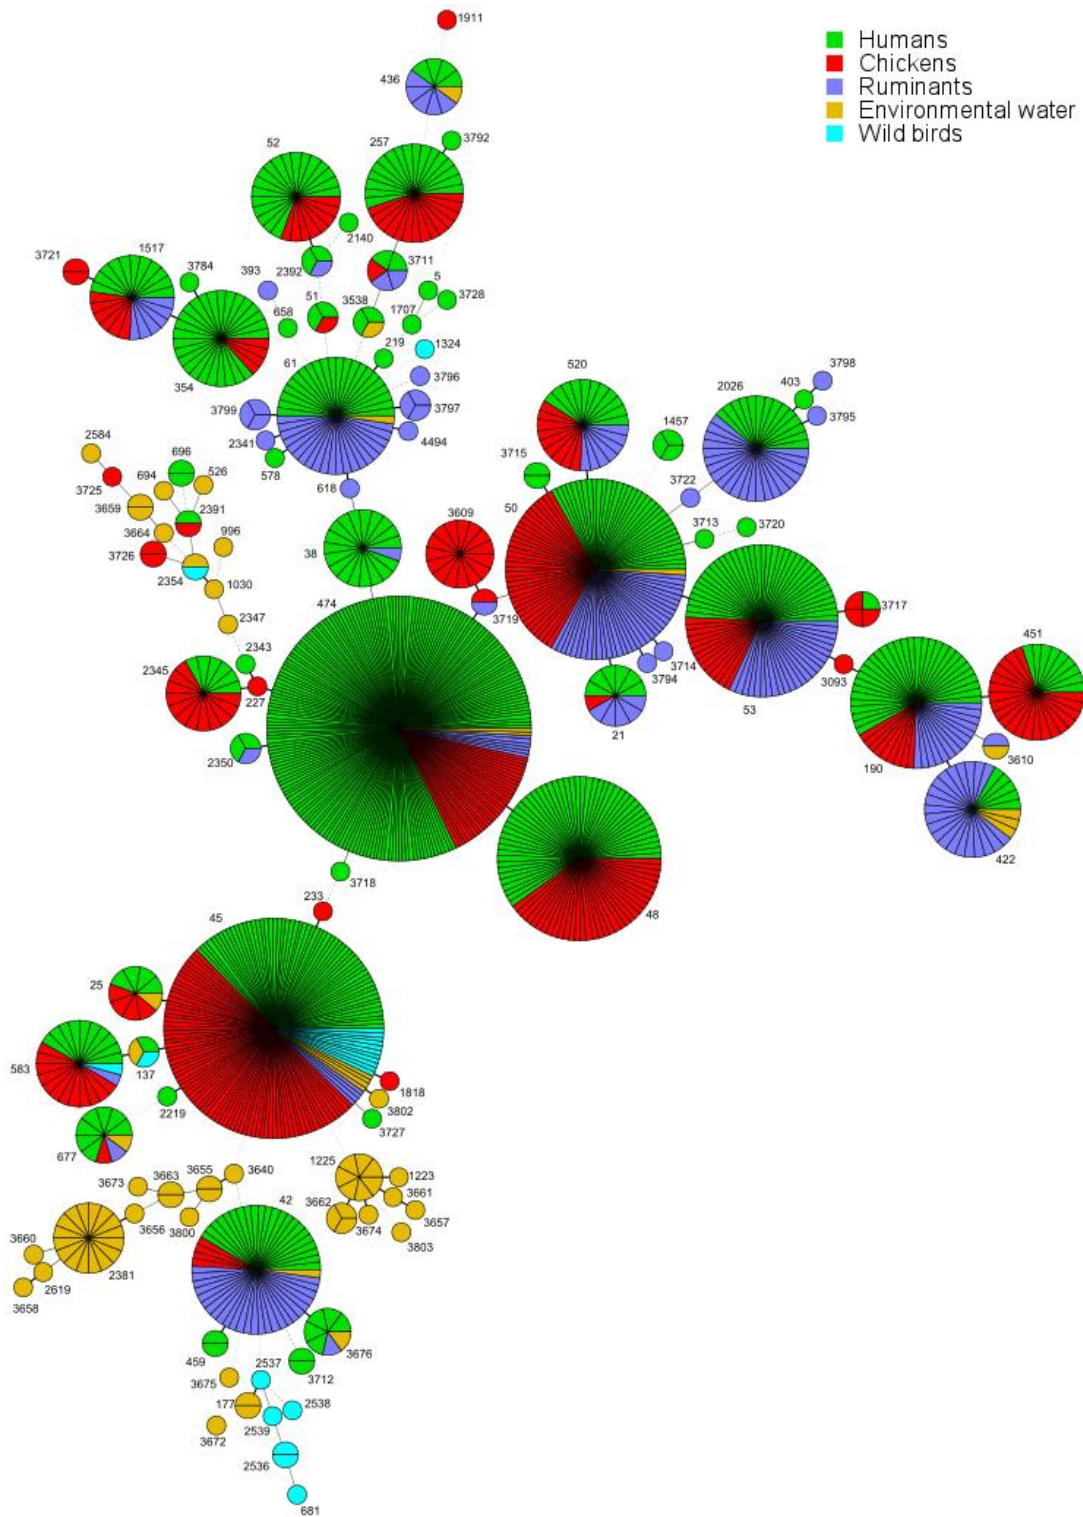

**Fig. S1:** Minimum spanning tree of *C. jejuni* STs from five different sources between 2005 and 2007 ('before intervention'). Each node represents a ST, and its diameter is proportional to the

number of isolates. The different colors represent different sources. The thickness of the connecting lines is proportional to the similarities between STs, with the thickest connector linking single locus variants.

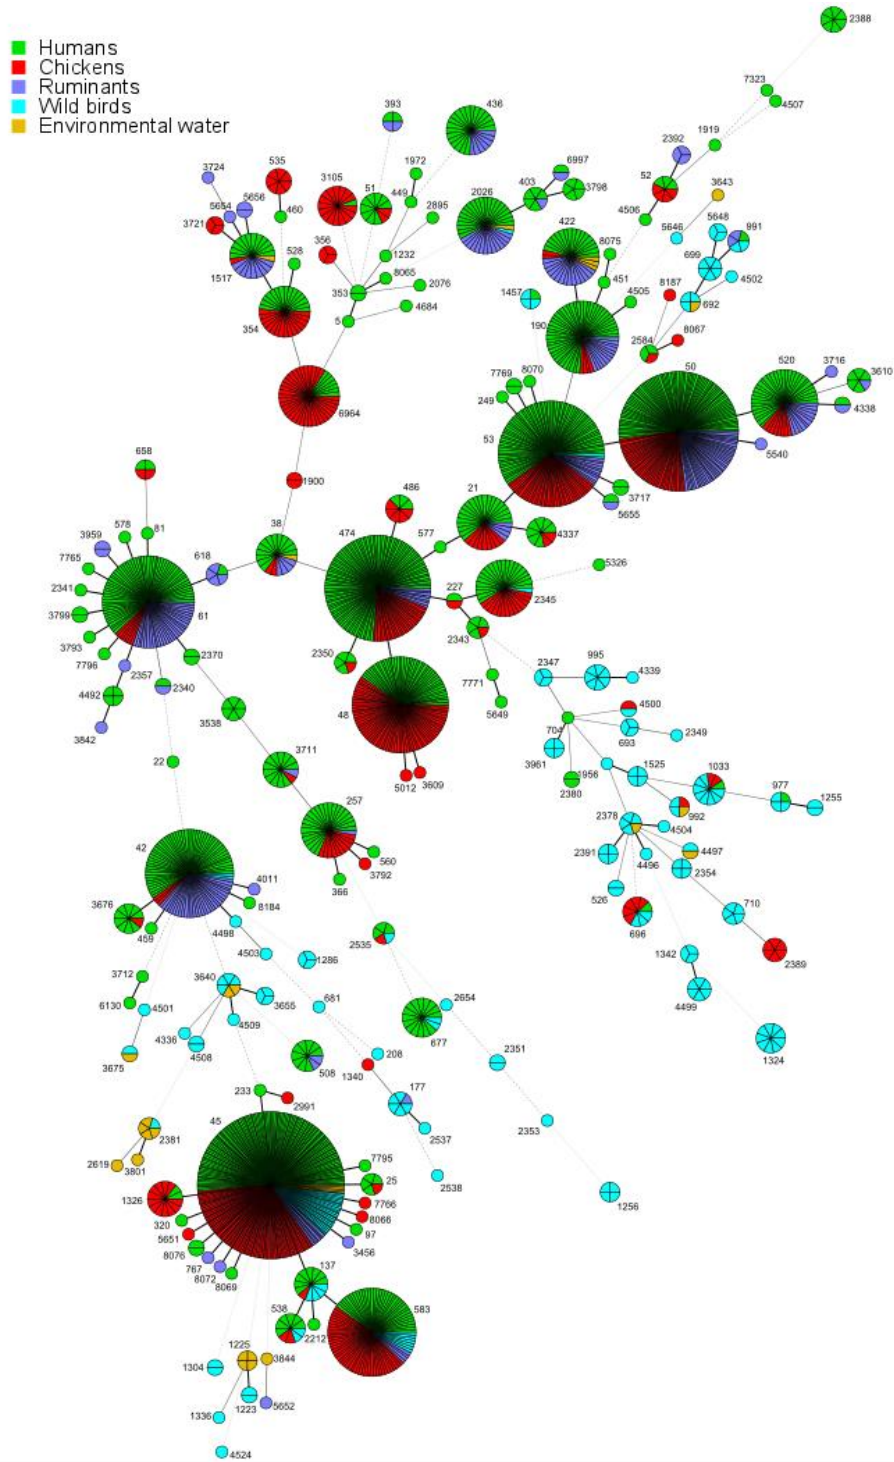

**Fig. S2:** Minimum spanning tree of *C. jejuni* STs from 5 different sources between 2008 and 2015 ('after intervention'). Each node represents a ST, and its diameter is proportional to the number of isolates. The different colors represent different sources. The thickness of the

connecting lines is proportional to the similarities between STs, with the thickest connector linking single locus variants.

**Table S3:** Numerical indices measuring proportional similarity index, asymmetric island model and bayesian hierarchical model in *C. jejuni* (95% CrI are in brackets) after the intervention sources (The chicken suppliers are combined as one chicken source).

| Index                          | Source |                  |                  |                     |                  |
|--------------------------------|--------|------------------|------------------|---------------------|------------------|
|                                | Human  | Chickens         | Ruminants        | Environmental water | Wild birds       |
| Proportional similarity index  | NA     | 0.52 (0.47-0.55) | 0.51 (0.44-0.54) | 0.17 (0.06-0.18)    | 0.21 (0.16-0.23) |
| Asymmetric island model output | NA     | 0.48 (0.42-0.53) | 0.47 (0.41-0.52) | 0.02 (0.00-0.06)    | 0.02 (0.00-0.05) |
| Bayesian hierarchical model    | NA     | 0.44 (0.35-0.52) | 0.39 (0.31-0.50) | 0.10 (0.00-0.19)    | 0.04 (0.00-0.11) |
